MS ID#: BIORXIV/2019/643494

MS TITLE: Jasmonate-regulated ERF109-MYB51-MYC3 ternary complexes control indolic glucosinolates biosynthesis

**kaixuan Zhang<sup>a#</sup>, Yu Meng<sup>a,b#</sup>, Jinbo Li<sup>a,c#</sup>, Mengqi Ding<sup>a</sup>, Muhammad Khurshid<sup>a,d</sup>, Qiong Li<sup>e</sup>, Xiaoling Lu<sup>a</sup>, Meiliang Zhou<sup>a\*</sup>**

<sup>a</sup>Institute of Crop Sciences, Chinese Academy of Agricultural Sciences, Beijing 100081, China;

<sup>b</sup>College of Landscape and Travel, Agricultural University of Hebei, Baoding 071001, China;

<sup>c</sup>Life Science College, Luoyang Normal University, Luoyang 471934, China

<sup>d</sup>Institute of Biochemistry and Biotechnology, University of the Punjab, Lahore 54590, Pakistan;

<sup>e</sup>School of Nursing, Hunan University of Chinese Medicine, Changsha 410208, China

The authors have withdrawn this manuscript because mistakes were found on the figures and some experiments will need to be reconfirmed. Therefore, the authors do not wish this work to be cited as reference for the project. If you have any questions, please contact the corresponding author.

MS ID#: BIORXIV/2019/643494

MS TITLE: Jasmonate-regulated ERF109-MYB51-MYC3 ternary complexes control indolic glucosinolates biosynthesis

**kaixuan Zhang<sup>a#</sup>, Yu Meng<sup>a,b#</sup>, Jinbo Li<sup>a,c#</sup>, Mengqi Ding<sup>a</sup>, Muhammad Khurshid<sup>a,d</sup>, Qiong Li<sup>e</sup>, Xiaoling Lu<sup>a</sup>, Meiliang Zhou<sup>a\*</sup>**

<sup>a</sup>Institute of Crop Sciences, Chinese Academy of Agricultural Sciences, Beijing 100081, China;

<sup>b</sup>College of Landscape and Travel, Agricultural University of Hebei, Baoding 071001, China;

<sup>c</sup>Life Science College, Luoyang Normal University, Luoyang 471934, China

<sup>d</sup>Institute of Biochemistry and Biotechnology, University of the Punjab, Lahore 54590, Pakistan;

<sup>e</sup> School of Nursing, Hunan University of Chinese Medicine, Changsha 410208, China

The authors have withdrawn this manuscript because mistakes were found on the figures and some experiments will need to be reconfirmed. Therefore, the authors do not wish this work to be cited as reference for the project. If you have any questions, please contact the corresponding author.
